# Supplementary material for: Exogenous R-Spondin1 Induces Precocious Telogen-to-Anagen Transition in Mouse Hair Follicles
Source: PubMed Central journal article supplement (PMC4849038; doi:10.3390/ijms17040582), 2016-04-20
Supplement: ijms-17-00582-s001.pdf [file ijms-17-00582-s001.pdf]

# Supplementary Materials: Exogenous R-Spondin1 Induces Precocious Telogen-to-Anagen Transition in Mouse Hair Follicles

Na Li, Shu Liu, Hui-Shan Zhang, Zhi-Li Deng, Hua-Shan Zhao, Qian Zhao, Xiao-Hua Lei, Li-Na Ning, Yu-Jing Cao, Hai-Bin Wang, Shuang Liu and En-kui Duan

Table S1. Primers used for qPCR and RT-PCR assays.

| Gene          | Forward Primer (5'-3')    | Reverse Primer (5'-3')    |
|---------------|---------------------------|---------------------------|
| <i>Rspo1</i>  | GGGATCAAGGGCAAGAGACAG     | CTGGCGGATGTCGTTCCCTC      |
| <i>Rspo2</i>  | ATAGAGGCCGCTGCTTTG        | TGCCGTGTTCTGGTTTCC        |
| <i>Rspo3</i>  | TGGATATTACGGAACTCG        | CTAACCCCTTCTGGGCAAC       |
| <i>Rspo4</i>  | CTCGCCCTGTACCGAAGGA       | CACCTGCCGTAAGTACGGATG     |
| <i>Gapdh</i>  | GGTTGTCTCCTGCGACTTCAACAGC | CGAGTTGGGATAGGGCCTCTCTTGC |
| <i>Ki67</i>   | ATCATTGACCGCTCCTTTAGGT    | GCTCGCCTTGATGGTTCCT       |
| <i>Ccnd1</i>  | GGGATGTGAGGGAAGAGGTGA     | GCAGCGAAAACAACGTGAAA      |
| <i>Ccnd2</i>  | CTGTGCGCTACCGACTTCAA      | CACATCAGTGTGGGTGATCTTG    |
| <i>Ccnd3</i>  | TTGCATCTATACGGACCAGGC     | AGGAAGTCGTGCGCAATCA       |
| <i>Ccnb1</i>  | CTCAGGGTCACTAGGAACACG     | AGCTCTTCGCTGACTTTATTACC   |
| <i>Cdkn1a</i> | TCTTGCACCTCTGGTGTCT       | CTCTTGACAGAACCAATCT       |
| <i>Cdkn1b</i> | AATTGGGTCTCAGGCAAAC       | CCCTTTTGTGTTTGCGAAGAAG    |
| <i>Cdkn1c</i> | ACGAGAATCAAGAGCAGC        | AGTTCTCTTGCGCTTGG         |
| <i>Tcf7</i>   | GCCAGAAGCAAGGAGTTCAC      | ACTGGGCCAGCTCACAGTAT      |
| <i>Cd34</i>   | AAGGCTGGGTGAAGACCCTTA     | TGAATGGCCGTTTCTGGAAGT     |
| <i>Cd44</i>   | AGCCCCTCCTGAAGAAGACT      | ACTCGCCCTTCTTGCTGTAG      |
| <i>Sox7</i>   | CCCTTACTCACCAGGAGTTCA     | GGGGACATCCAGAAACAGAG      |
| <i>Sox9</i>   | ACTCACATCTCTCCTAATGCT     | CGTCGGTTTTGGGAGTG         |
| <i>Sox21</i>  | AACACTCGCAGGTGGCG         | AGATCGCAGGTCTGCTCTG       |
| <i>Krt10</i>  | CGAGGACCTTAAGGGGCAG       | CAGGGTCACCTCATTCTCGTAT    |
| <i>Krt17</i>  | CAGGCTGGGGTCAGCTAGT       | CCAAAGTTGCCTCCATAACC      |
| <i>Krt5</i>   | GGAGATCGCCACCTACAGGA      | TCCGTAGCCAGAAGAGACACT     |
| <i>Lgr4</i>   | CCCRACTTCGCATTCACCAA      | GCCTGAGGAAATTCATCCAAGTT   |
| <i>Lgr5</i>   | CCTACTCGAAGACTTACCCAGT    | GCATTGGGGTGAATGATAGCA     |
| <i>Lgr6</i>   | GAGGACGGCATCATGCTGTC      | GCTCCGTGAGGTTGTTCACT      |
| <i>Axin2</i>  | AACCTATGCCCGTTTCCTCTA     | GAGTGTAAGACTTGGTCCACC     |
| <i>Myc</i>    | GTGTTTCTGTGTTAATGCCAC     | CACAAGTCAGTGGGTTTCC       |
| <i>Lef1</i>   | GCCACCGATGAGATGATCCC      | TTGATGTCGGCTAAGTCGCC      |
| <i>Wnt1</i>   | CAGGGTTCATAGCGATCCATCT    | CCCTCAGGATGGCAAAGG        |
| <i>Wnt2</i>   | GACTACGGGATCAAGTTTGC      | CACACCATGACACTTGCA        |
| <i>Wnt2b</i>  | CCCTCCACTTCAAGCCTCTGA     | AGCCATAGCAGCCCAGGATT      |
| <i>Wnt3</i>   | GCCCGCTCAGCTATGAACAA      | CCCGTGGCATTACACTTTAGG     |
| <i>Wnt3a</i>  | GCCTCCGCTGGAGTAGCTTT      | GGCTGCTGCACCCACAGATA      |
| <i>Wnt4</i>   | AGGAGTGCCAATACCAGT        | GCTGAAGAGATGGCGTATAC      |
| <i>Wnt5a</i>  | GCTTCGCTTGAATTCCTCG       | TGGAAGACATGGCACCT         |
| <i>Wnt5b</i>  | CCACTGGTGTGCTTTGTCAGA     | CCCGTGTGGTGCAGTCACTT      |
| <i>Wnt6</i>   | CCAGCAGCTCCCTAGGAAAAGT    | GGCTGGTGTAACCCCAAGTTC     |
| <i>Wnt7a</i>  | CGCCAAGGTCTTCGTGGAT       | CGACCCGCTCGTTATTGT        |
| <i>Wnt7b</i>  | CAGCACCAGTTCCGATT         | CGTGATGGCATAGGTGAAG       |
| <i>Wnt8a</i>  | CCGGCAGATGGGAAATTACC      | CTCTGTTGCCAGCCCTTAGCT     |

Table S1. Cont.

| Gene                              | Forward Primer (5'-3')  | Reverse Primer (5'-3')   |
|-----------------------------------|-------------------------|--------------------------|
| <i>Wnt8b</i>                      | ACCCTGCCTTTCTCCGAAGA    | GCGGTGAAGGACACAAGTGACT   |
| <i>Wnt9a</i>                      | GACAACCTCAAGTACAGCA     | ACCATGGCATTGCAAGT        |
| <i>Wnt9b</i>                      | GGCCCTTCCTTAAGTCACACAAG | ACAAACAGAGGGTGGCAGAATG   |
| <i>Wnt10a</i>                     | TCGGAACAAAGTCCCCTACGA   | TGCTATGGCGTAGGCCGAAAG    |
| <i>Wnt10b</i>                     | TGCTCTCTTTCAGCCCTTTGC   | CTCAGGCAGATGCTCTGAGCTT   |
| <i>Wnt11</i>                      | AAGGTGGTACACCGGCTATG    | GAGTCCTTACAGGCCGGATA     |
| <i>Wnt16</i>                      | GTCATGCAGTGCAGGCAAC     | GCCTTCACTTGGTGAGCCAC     |
| <i>Alx4</i>                       | GGACGGTAGCCTCAAGCTC     | CACGGGTCAGAGTCAGGA       |
| <i>Fgf7</i>                       | ACCTGAGGATTGACAAACGAGG  | CCACGGTCCTGATTTCCATGA    |
| <i>Vim</i>                        | CGGCTGCGAGAGAAATTGC     | CCACTTTCCGTTCAAGGTCAAG   |
| <i>Krt14</i>                      | AGCGGCAAGAGTGAGATTTCT   | CCTCCAGGTTATTCTCCAGGG    |
| <i>Kit</i>                        | TGACGGTACATGGCTGCATT    | ACCACCGTAAATGTGTCCCC     |
| <i>Ptprc</i>                      | GTTTTCGCTACATGACTGCACA  | AGGTTGTCCAACACTGACATCTTC |
| <i>Gsk-3<math>\beta</math></i>    | TGGTGTGGATCAGTTGGTGG    | GGCCGGAAGACCTTTGTCC      |
| <i><math>\beta</math>-catenin</i> | ATGGAGCCGGACAGAAAAGC    | CTTGCCACTCAGGGAAGGA      |

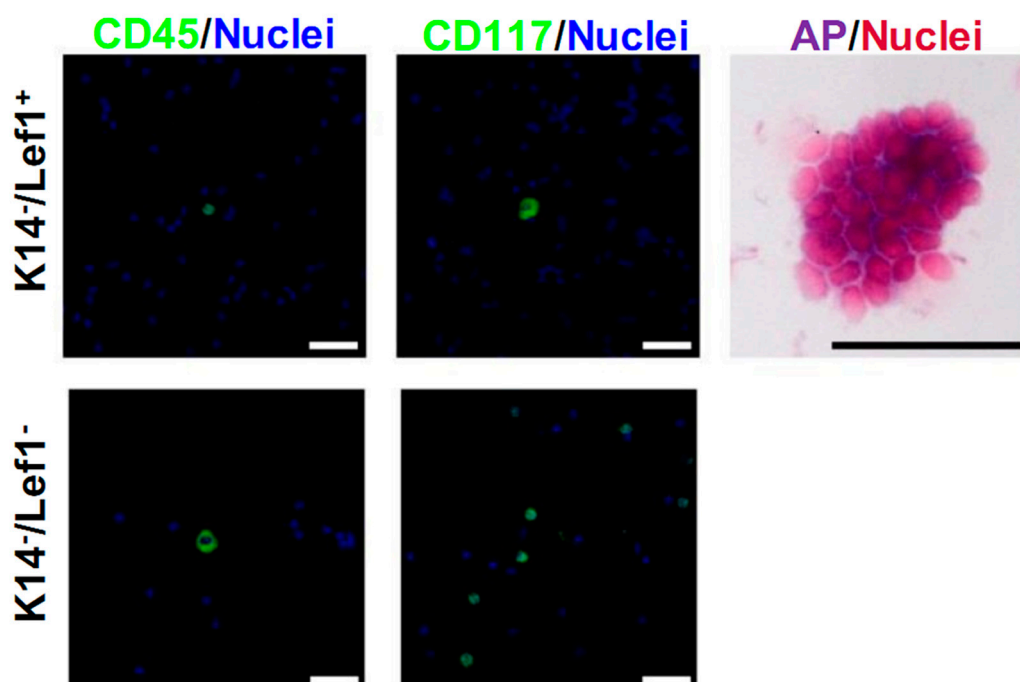

Figure S1. Immunostaining of CD45 and CD117 in the K14<sup>-</sup>/Lef1<sup>+</sup> and K14<sup>-</sup>/Lef1<sup>-</sup> cell populations and AP staining in K14<sup>-</sup>/Lef1<sup>+</sup> cells. AP, alkaline phosphatase. Bar = 50  $\mu$ m.

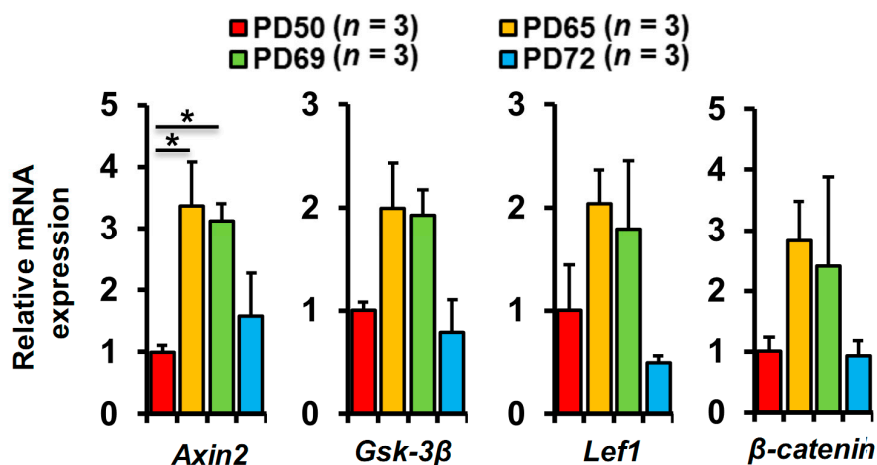

**Figure S2.** Relative expression of Wnt signaling related genes in the DP in different periods of telogen. PD, postnatal day. \*  $p < 0.05$ .

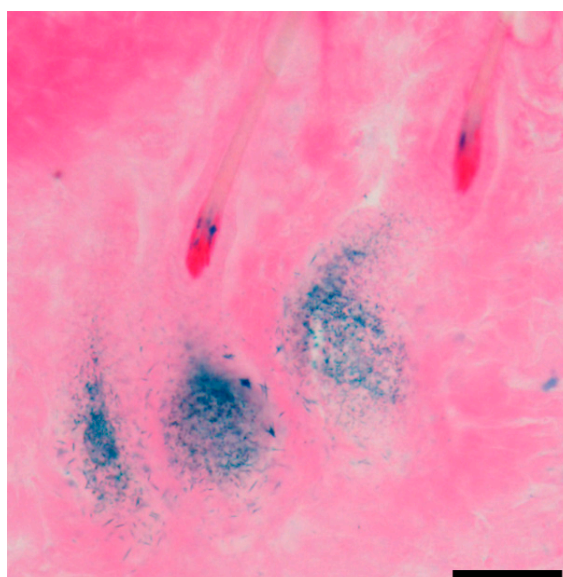

**Figure S3.** X-gal staining of dorsal skin of TOP-Gal mice injected with R-spondin1-Fc one week after the initial injection with eosin counterstaining. Bar = 50  $\mu\text{m}$ .

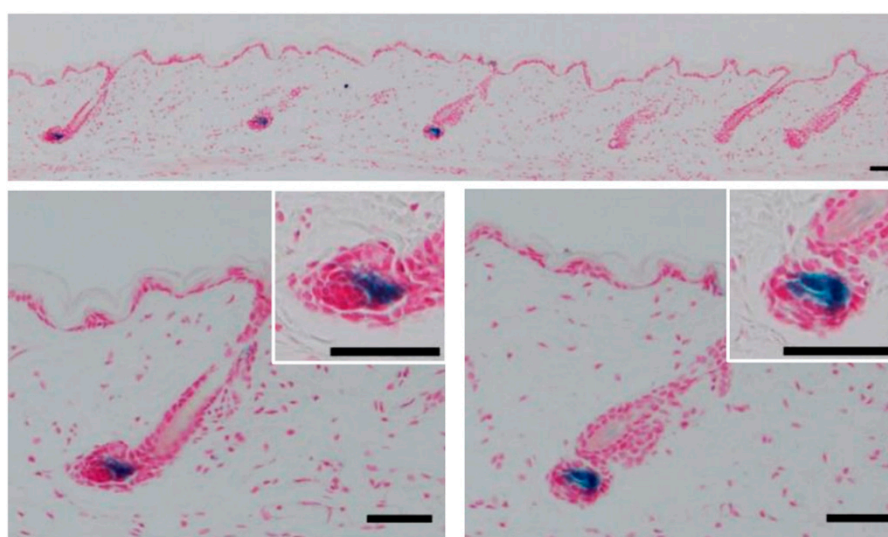

**Figure S4.** X-gal staining of dorsal skin of TOP-Gal mice injected with BSA on PD76 with nuclear fast red counterstaining. Bar = 50  $\mu\text{m}$ .

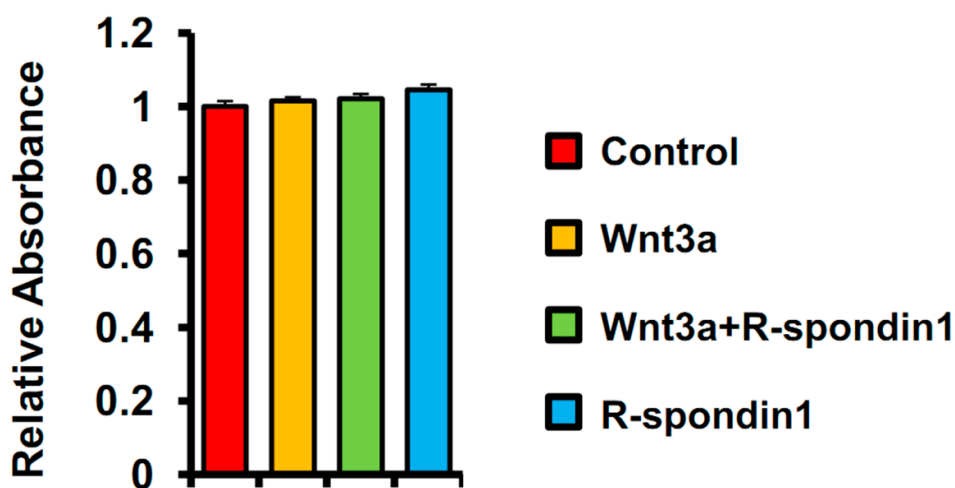

Figure S5. MTS assay of bulge stem cells treated with Wnt3a or/and R-spondin1 for 24 h following an 8 h starvation.

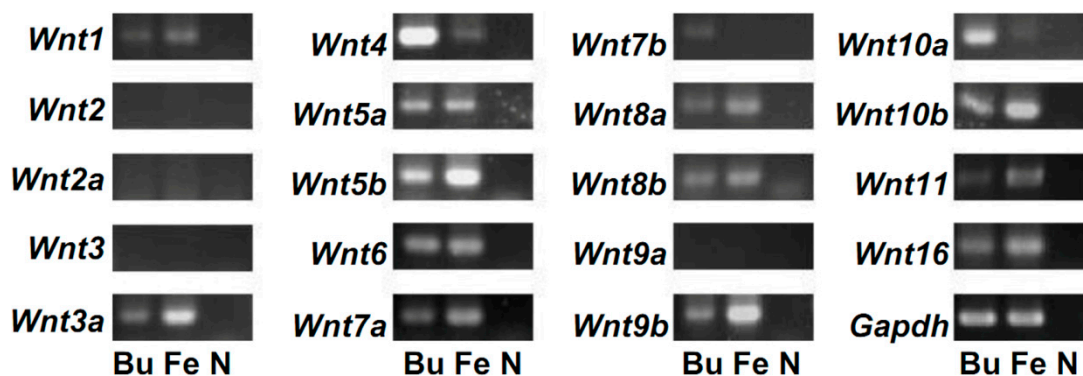

Figure S6. RT-PCR showing the expression of different Wnt ligands in bulge stem cells (Bu) and NIH-3T3 feeder cells (Fe). H<sub>2</sub>O was used instead of cDNA as a negative control (N) and *Gapdh* expression was assessed as an internal control.
